# Supplementary material
Source: publisher site journal article supplement (https://www.dovepress.com/get_supplementary_file.php?f=454992.docx)
Supplement: Supplementary file 1 [file get_supplementary_file.php]

Table S1. Definitions of chronic diseases.

| Chronic diseases | Definition |
| --- | --- |
| Chronic cardiovascular diseases | Hypertension,  Coronary heart disease,  Cardiac arrhythmia,  Cardiomyopathy,  Valvular heart disease,  Chronic heart failure |
| Chronic respiratory diseases | Asthma,  Chronic obstructive pulmonary disease,  Bronchiectasis,  Interstitial lung disease,  Lung Cancer |
| Chronic hepatic diseases | Chronic hepatitis,  Liver cirrhosis,  Hepatocellular carcinoma |
| Chronic renal diseases | Chronic kidney disease,  Primary glomerulonephritis,  Renal cell carcinoma |
| Chronic hematological diseases | Leukemia,  Lymphoma,  Anemia |
| Chronic cerebrovascular diseases | Parkinson's disease,  Dementia |


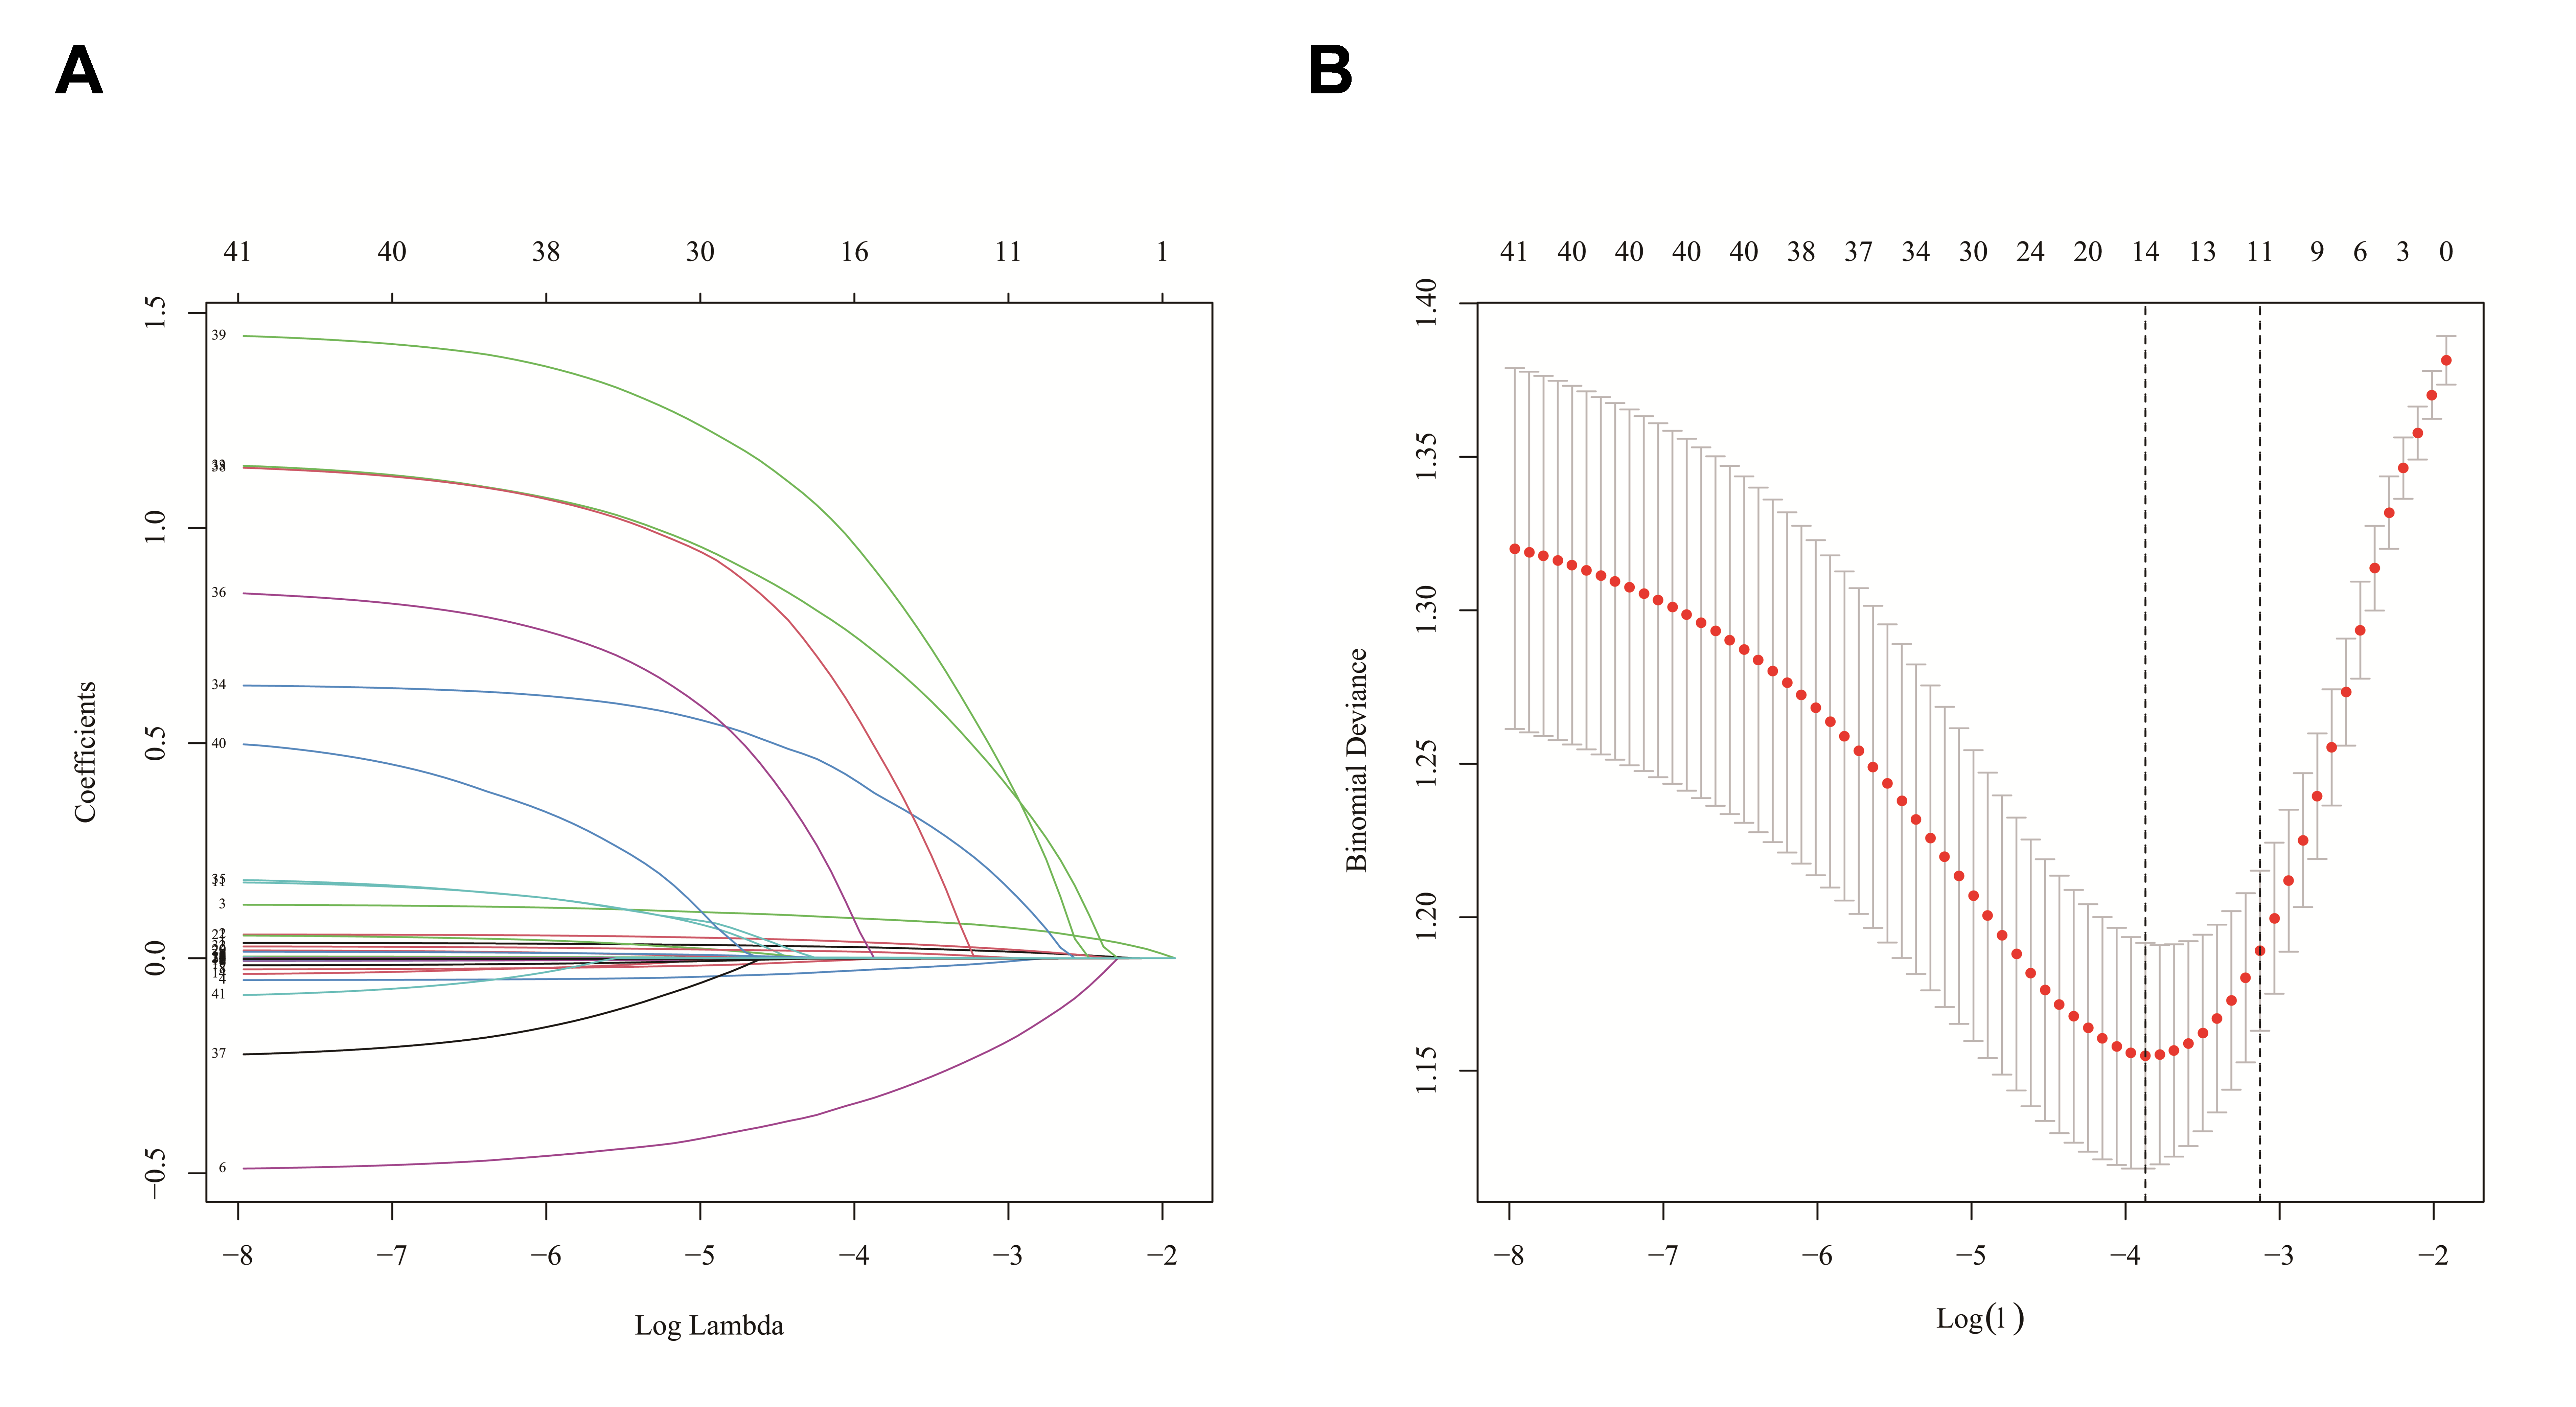


Figure S1. Predictors selection using LASSO regression model in the training cohort. A. LASSO coefficient profiles of the 41 clinical baseline features. A coefficient profile plot was produced against the log (lambda) sequence. B. The selection process of the optimal penalization coefficient λ by 10-fold cross-validation method. The two dotted vertical lines were drawn at the optimal scores by minimum criteria and 1-SE criteria. A total of 11 variables were finally selected. The partial likelihood deviance (binomial deviance) curve was plotted versus log (lambda). SE, standard error; LASSO, least absolute shrinkage and selection operator.


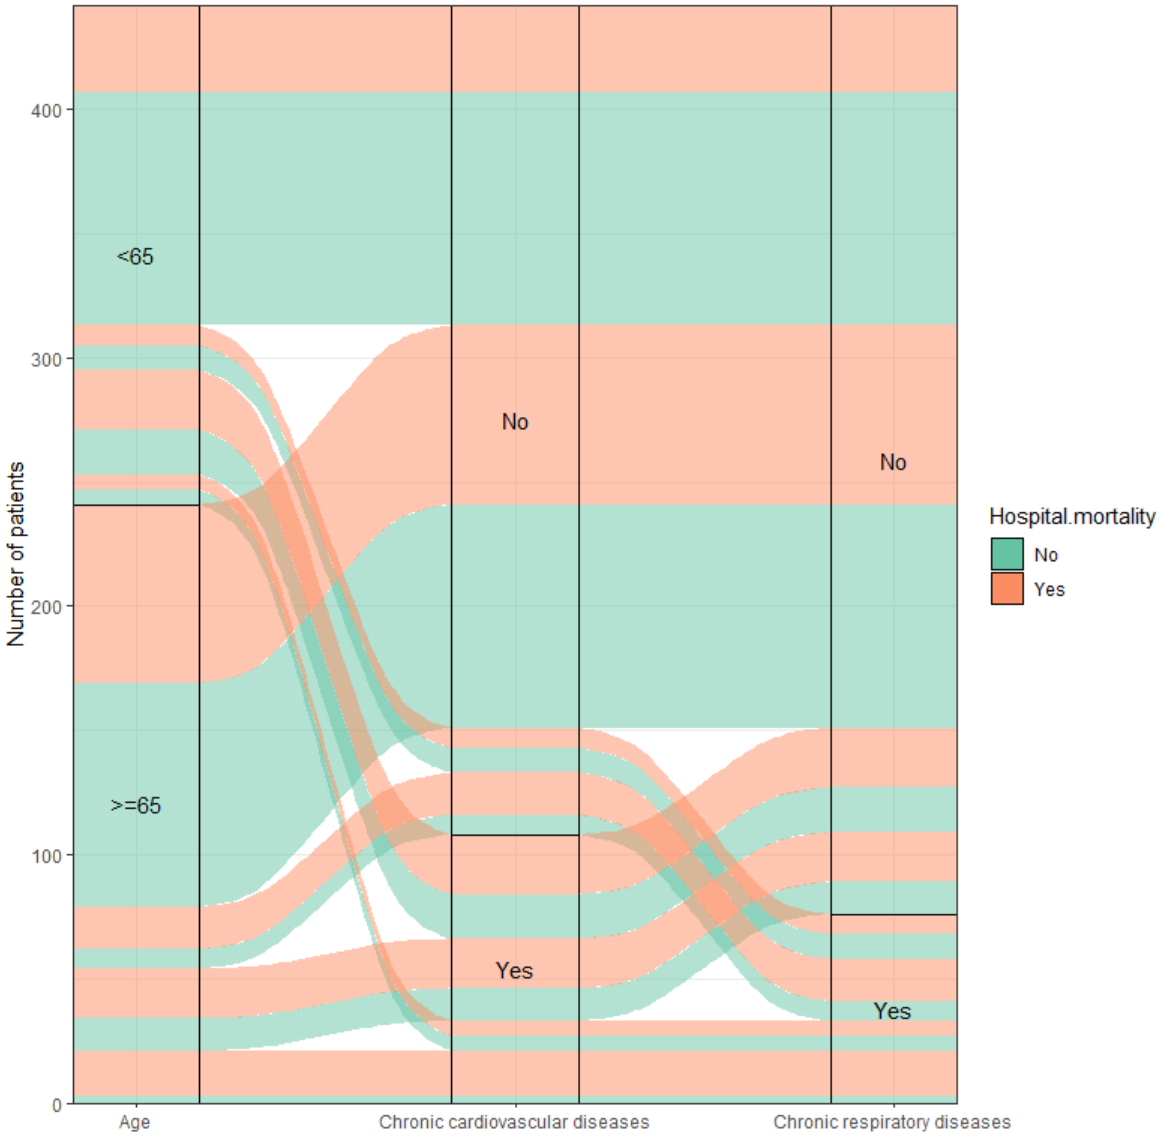


Figure S2. The Sankey diagram showed the distributions of age, chronic cardiovascular diseases and chronic respiratory diseases among patients with pneumonia-associated ARDS. The patients with age ≥ 65 years or with chronic diseases had relatively high mortality.


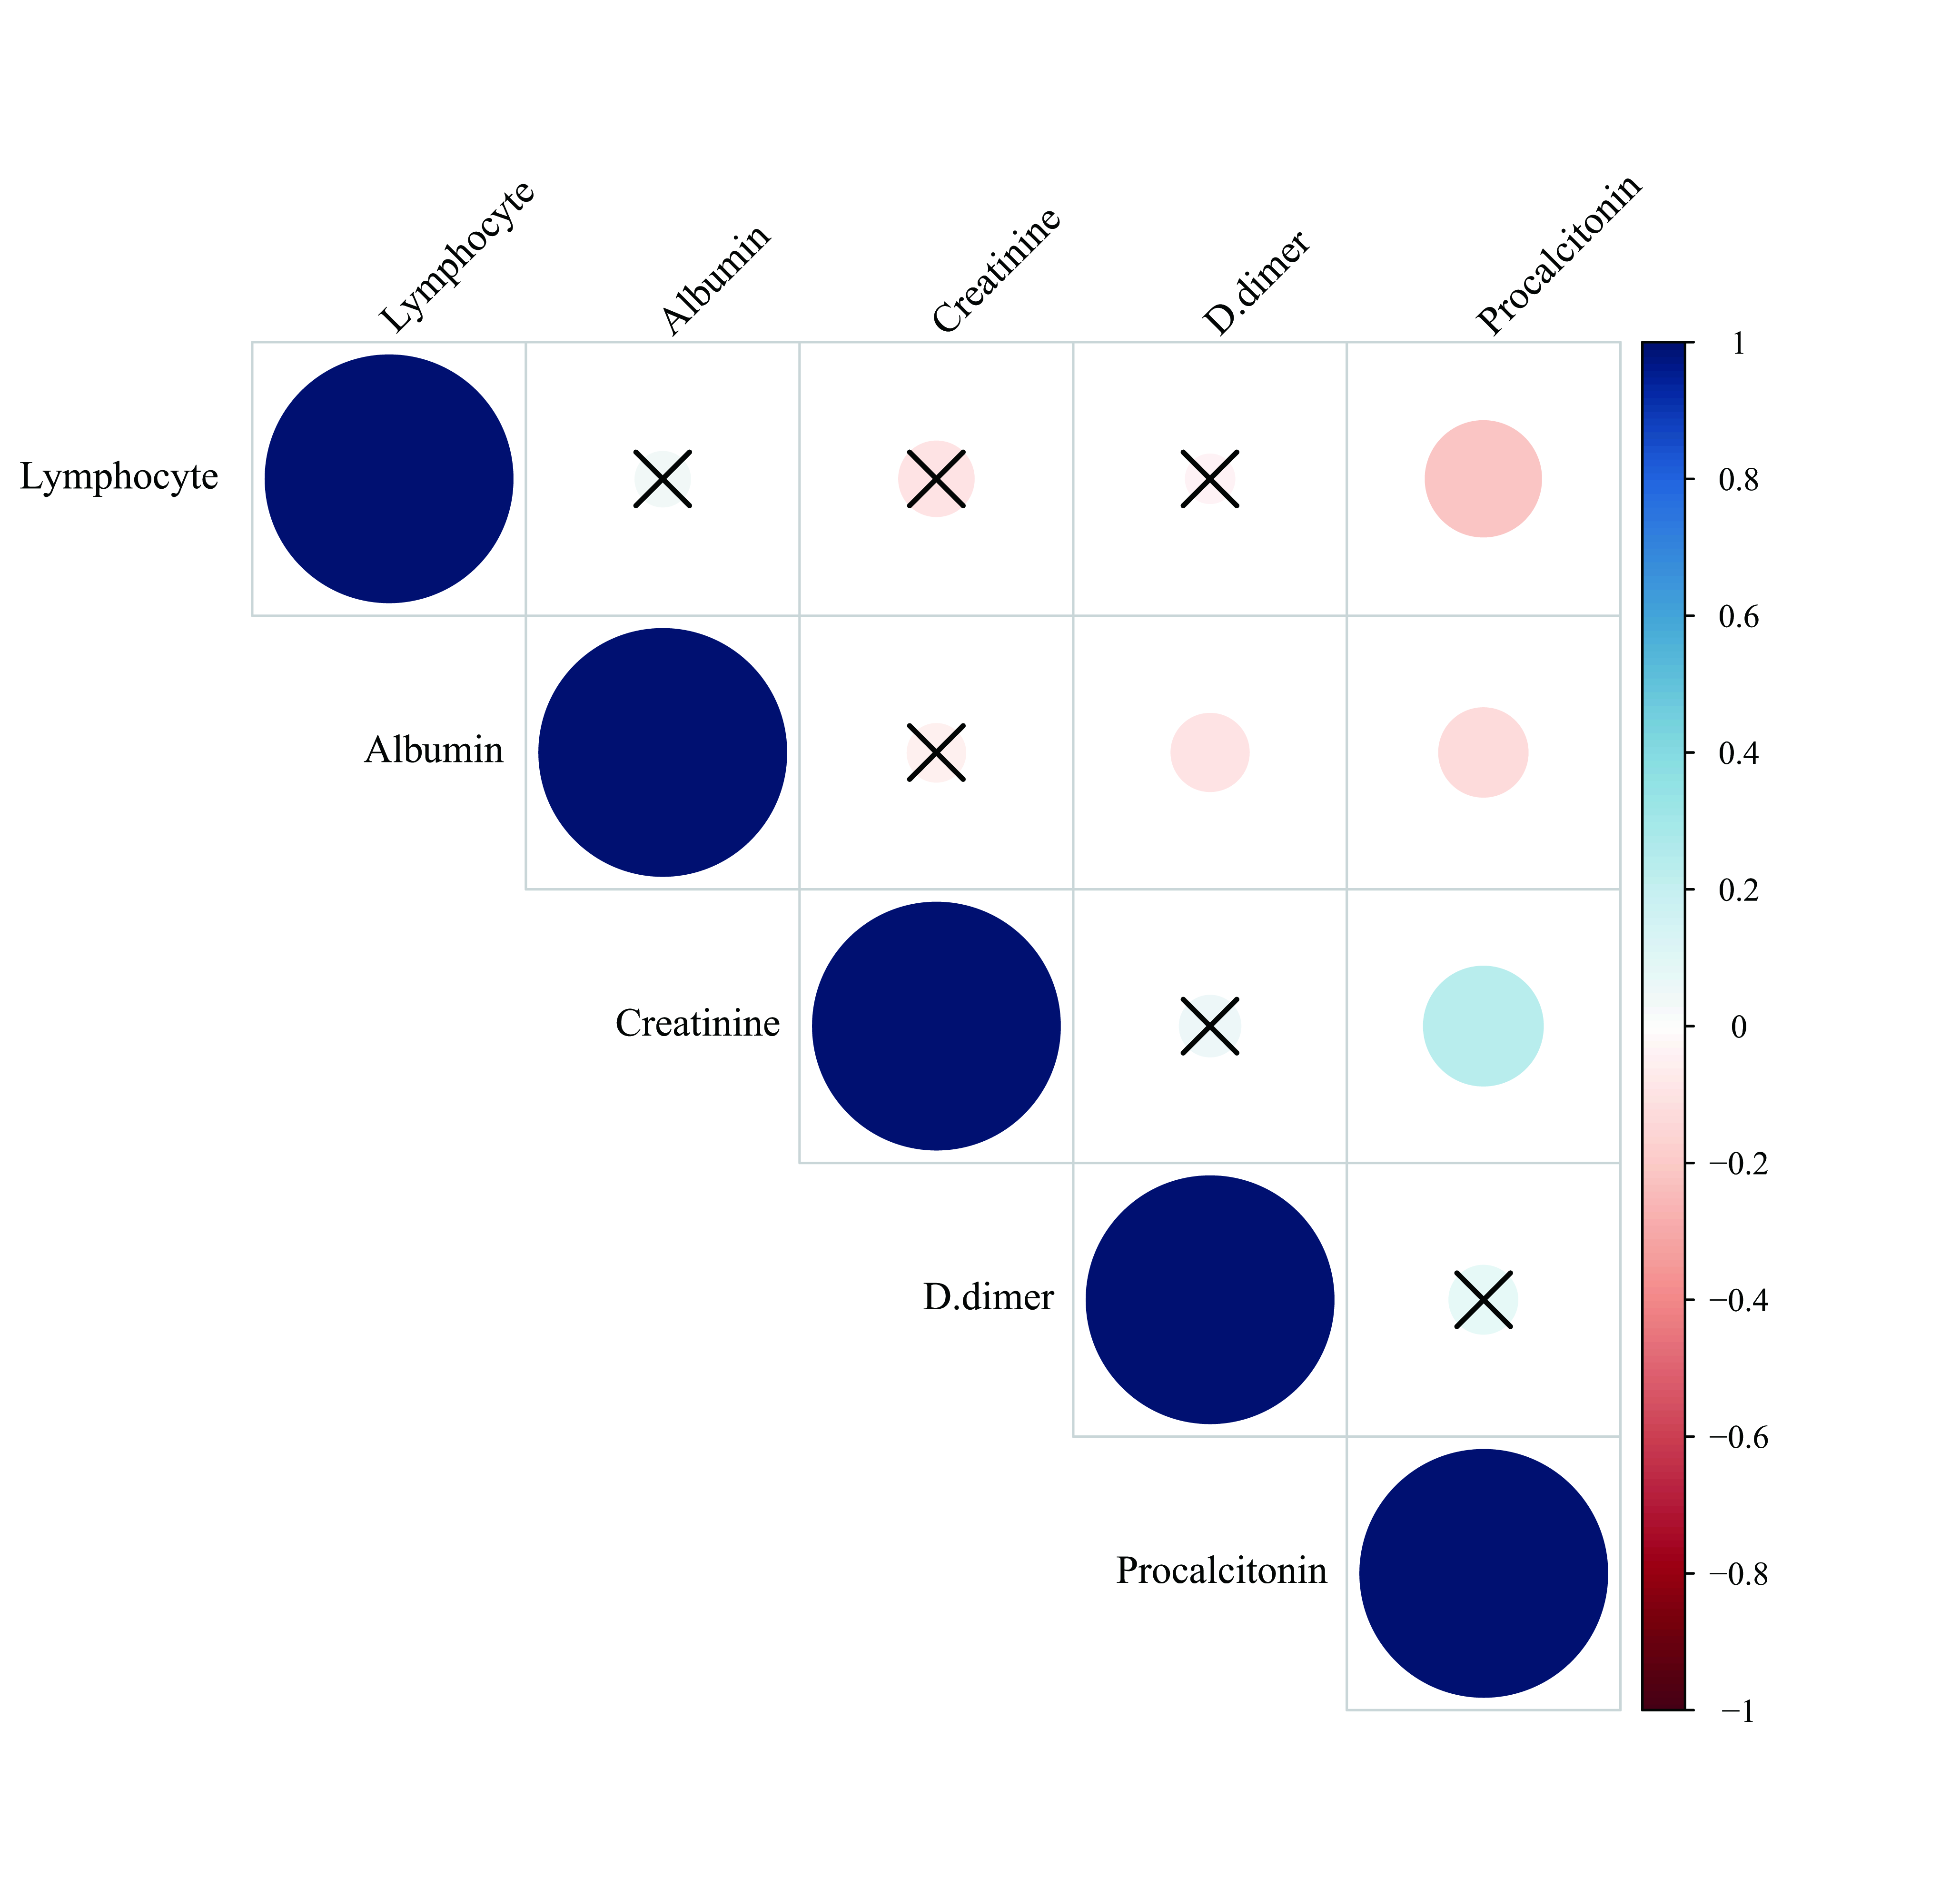


Figure S3. The Spearman correlation analysis of lymphocytes, albumin, creatinine, D-dimer and procalcitonin. The procalcitonin were positively correlated with creatinine and was negatively correlated with lymphocytes and albumin (P < 0.05). The D-dimer was also negatively correlated with albumin (P < 0.05). The “X” represents no correlation between variables with P>0.05.
